# Supplementary material
Source: Research Square preprint supplement (doi:10.21203/rs.3.rs-8919373/v1)
Supplement: Supplementary file 1 [file ec1d6d9e7b66e53bd4be3730.xlsx]

## Sheet: Feuil1
Crops from Mialyk et al (2024)	MapSpam2020
Wheat	whea
Rice	rice
Barley	barl
Maize (corn)	maiz
Rye	ocer
Oats	ocer
Millet	mill
Sorghum	sorg
Buckwheat	ocer
Quinoa	ocer
Fonio	ocer
Triticale	ocer
Canary seed	ocer
Mixed grain	ocer
Cereals n.e.c.	ocer
Potatoes	pota
Sweet potatoes	swpo
Cassava, fresh	cass
Yautia	orts
Taro	orts
Yams	yams
Edible Root and Tubers and tubers with high starch or inulin content, n.e.c., fresh	orts
Sugar cane	sugc
Sugar beet	sugb
Other sugar crops n.e.c.	rest
Beans, dry	bean
Broad beans and horse beans, dry	opul
Peas, dry	opul
Chick peas, dry	chic
Cow peas, dry	cowp
Pigeon peas, dry	pige
Lentils, dry	lent
Bambara beans, dry	opul
Vetches	opul
Lupins	opul
Other pulses n.e.c.	opul
Brazil nuts, in shell	rest
Cashew nuts, in shell	rest
Chestnuts, in shell	rest
Almonds, in shell	rest
Walnuts, in shell	rest
Pistachios, in shell	rest
Kola nuts	rest
Hazelnuts, in shell	rest
Areca nuts	rest
Other nuts (excluding wild edible nuts and groundnuts), in shell, n.e.c.	rest
Soya beans	soyb
Groundnuts, excluding shelled	grou
Coconuts, in shell	cnut
Oil palm fruit	oilp
Olives	ooil
Karite nuts (sheanuts)	ooil
Castor oil seeds	ooil
Sunflower seed	sunf
Rape or colza seed	rape
Tung nuts	ooil
Jojoba seeds	ooil
Safflower seed	ooil
Sesame seed	sesa
Mustard seed	rape
Poppy seed	ooil
Melonseed	ooil
Tallowtree seeds	ooil
Kapok fruit	ofib
Seed cotton, unginned	cott
Linseed	ooil
Hempseed	ooil
Other oil seeds, n.e.c.	ooil
Cabbages	vege
Artichokes	vege
Asparagus	vege
Lettuce and chicory	vege
Spinach	vege
Tomatoes	toma
Cauliflowers and broccoli	vege
Pumpkins, squash and gourds	vege
Cucumbers and gherkins	vege
Eggplants (aubergines)	vege
Chillies and peppers, green (Capsicum spp. and Pimenta spp.)	vege
Onions and shallots, green	onio
Onions and shallots, dry (excluding dehydrated)	onio
Green garlic	vege
Leeks and other alliaceous vegetables	vege
Other beans, green	vege
Peas, green	vege
Broad beans and horse beans, green	vege
String beans	vege
Carrots and turnips	vege
Okra	vege
Green corn (maize)	vege
Mushrooms and truffles	vege
Chicory Root and Tubers	vege
Locust beans (carobs)	vege
Fruit vegetable	vege
Bananas	bana
Plantains and cooking bananas	plnt
Oranges	citr
Tangerines, mandarins, clementines	citr
Lemons and limes	citr
Pomelos and grapefruits	citr
Other citrus fruit, n.e.c.	citr
Apples	temf
Pears	temf
Quinces	temf
Apricots	temf
Sour cherries	temf
Cherries	temf
Peaches and nectarines	temf
Plums and sloes	temf
Other stone fruits	temf
Other pome fruits	temf
Strawberries	temf
Raspberries	temf
Gooseberries	temf
Currants	temf
Blueberries	temf
Cranberries	temf
Other berries and fruits of the genus vaccinium n.e.c.	temf
Grapes	temf
Watermelons	trof
Cantaloupes and other melons	trof
Figs	trof
Mangoes, guavas and mangosteens	trof
Avocados	trof
Pineapples	trof
Dates	trof
Persimmons	trof
Cashewapple	trof
Kiwi fruit	temf
Papayas	trof
Other tropical fruits, n.e.c.	trof
Other fruits, n.e.c.	temf
Coffee, green	coff
Cocoa beans	coco
Tea leaves	teas
Maté leaves	rest
Hop cones	rest
Pepper (Piper spp.), raw	rest
Chillies and peppers, dry (Capsicum spp., Pimenta spp.), raw	rest
Vanilla, raw	rest
Cinnamon and cinnamon-tree flowers, raw	rest
Cloves (whole stems), raw	rest
Nutmeg, mace, cardamoms, raw	rest
Anise, badian, coriander, cumin, caraway, fennel and juniper berries, raw	rest
Ginger, raw	rest
Other stimulant, spice and aromatic crops, n.e.c.	rest
Peppermint, spearmint	rest
Pyrethrum, dried flowers	rest
Flax, processed but not spun	ofib
True hemp, raw or retted	ofib
Jute, raw or retted	ofib
Kenaf, and other textile bast fibres, raw or retted	ofib
Ramie, raw or retted	ofib
Sisal, raw	ofib
Agave fibres, raw, n.e.c.	ofib
Abaca, manila hemp, raw	ofib
Other fibre crops, raw, n.e.c.	ofib
Unmanufactured tobacco	toba
Natural rubber in primary forms	rubb
